# Supplementary material for: Gonorrhoea during COVID-19 in London, UK
Source: HighWire-hosted journal article supplement (doi:10.1136/sextrans-2020-054943), 2021-02-11
Supplement: sextrans-2020-054943supp001_data_supplement.pdf [file sextrans-2020-054943supp001_data_supplement.pdf]

Characteristics of individuals tested positive for *Neisseria gonorrhoeae* (NG) at 56 Dean Street in week 18 of 2019 and 2020

|                          | Week 18, 2019 | Week 18, 2020 | P- value |
|--------------------------|---------------|---------------|----------|
| n                        | 250           | 79            | -        |
| Gender, male (n, %)      | 243 (97%)     | 77 (97%)      | 0.90     |
| Age (median, IQR) y      | 32 (27 – 39)  | 30 (26-39)    | 0.19     |
| Consultation type (n, %) |               |               | <0.00001 |
| Asymptomatic screen      | 144 (58%)     | 14 (18%)      |          |
| Symptomatic screen       | 46 (18%)      | 42 (53%)      |          |
| Contact of an STI        | 44 (18%)      | 6 (8%)        |          |
| Treatment                | 16 (6%)       | 17 (22%)      |          |
| Sites positive for NG*   |               |               | 0.21     |
| One                      | 153 (61%)     | 40 (51%)      |          |
| Two                      | 81 (32%)      | 34 (43%)      |          |
| Three                    | 16 (6%)       | 5 (6%)        |          |
| HIV status (n,%)         |               |               | 0.64     |
| HIV-negative             | 194 (78%)     | 59 (75%)      |          |
| HIV-positive             | 50 (20%)      | 19 (24%)      |          |
| Unknown                  | 6 (2%)        | 1 (1%)        |          |

IQR, interquartile range; STI, Sexually transmitted infection

\*Individuals may test positive at more than one site e.g. urethral, throat and rectum
